# Supplementary material for: Optimizing Effective Parameters to Enhance the Sensitivity of Vertical Flow Assay for Detection of Escherichia coli
Source: MDPI journal article supplement (doi:10.3390/bios12020063), 2022-01-25
Supplement: s1 [file s1]

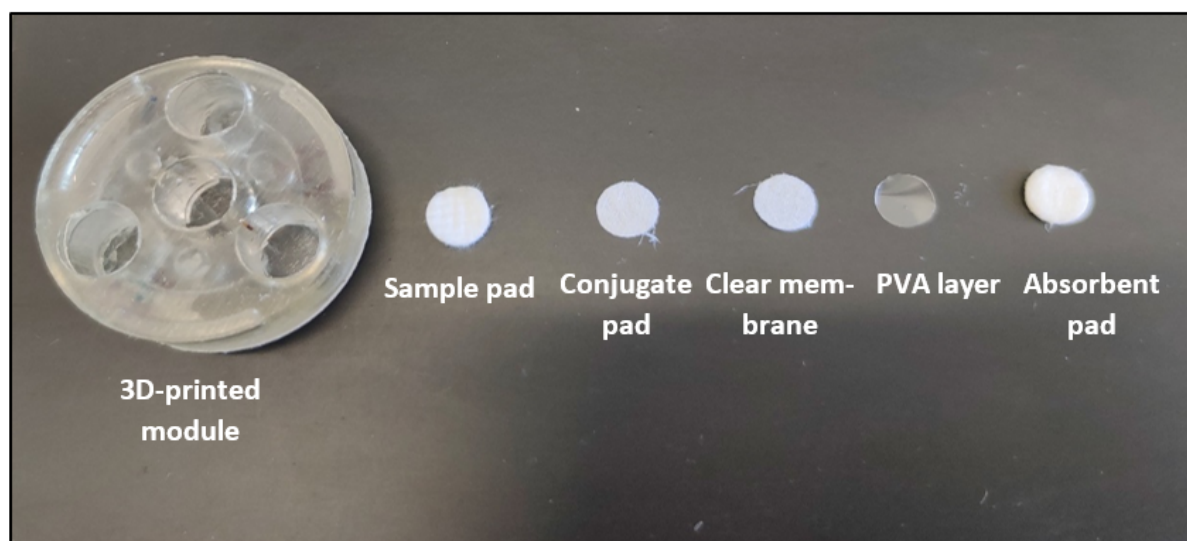

**Figure S1.** Image of vertical flow set-up built from a series of layers.

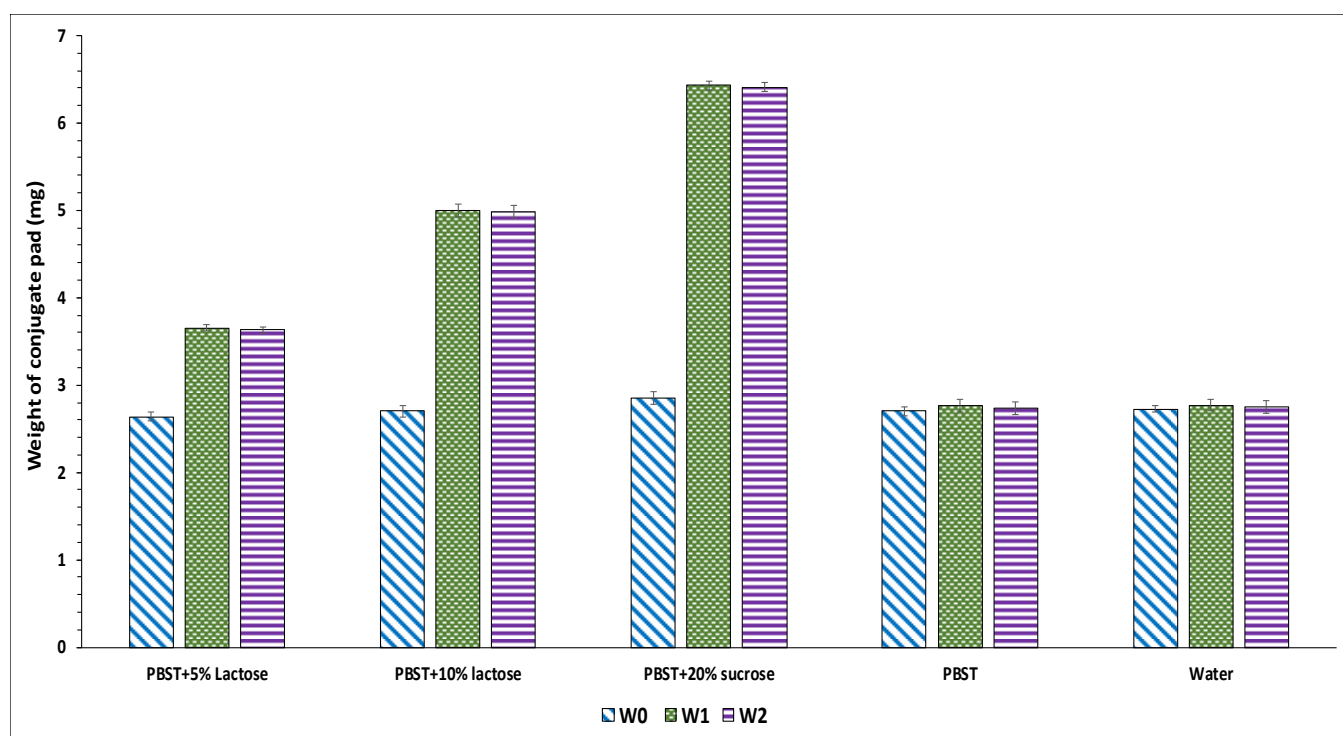

**Figure S2:** Depiction of the efficacy of air-drying process based on the dry-weight of conjugate pads.

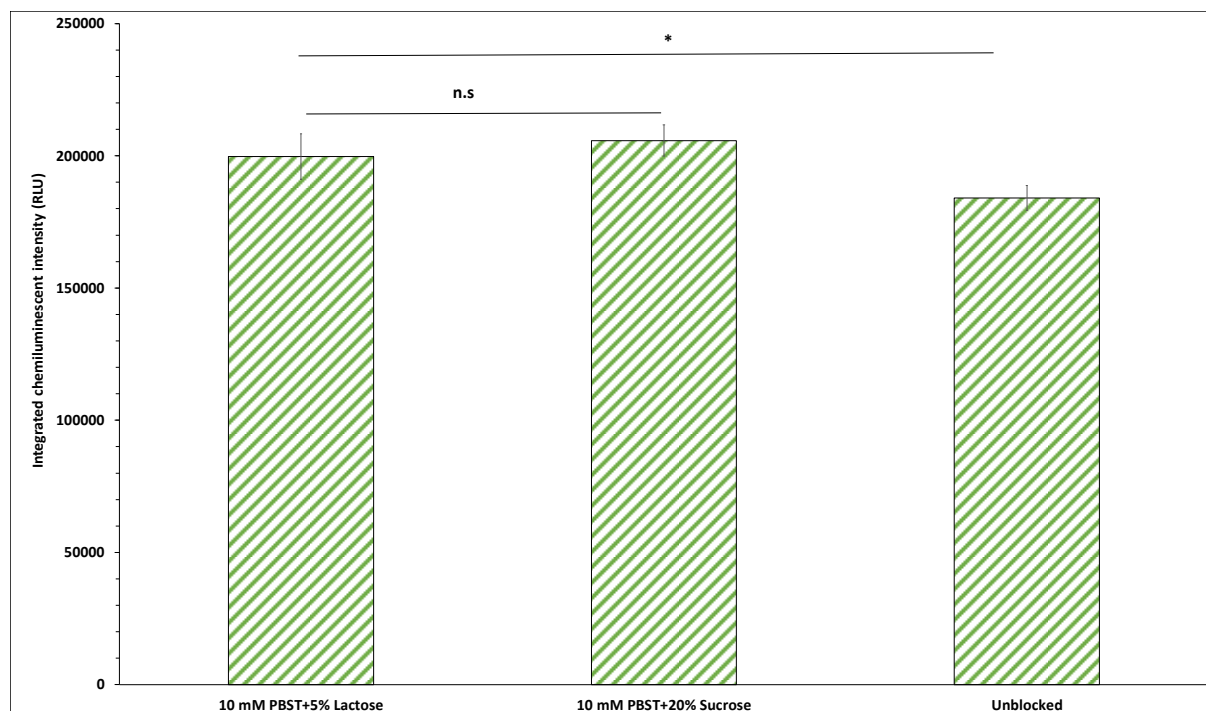

**Figure S3.** Effect of conjugate pad blocking on the integrated chemiluminescent intensity of VFIA platform (\*  $p < 0.05$ , by ANOVA, n.s.- not significant).

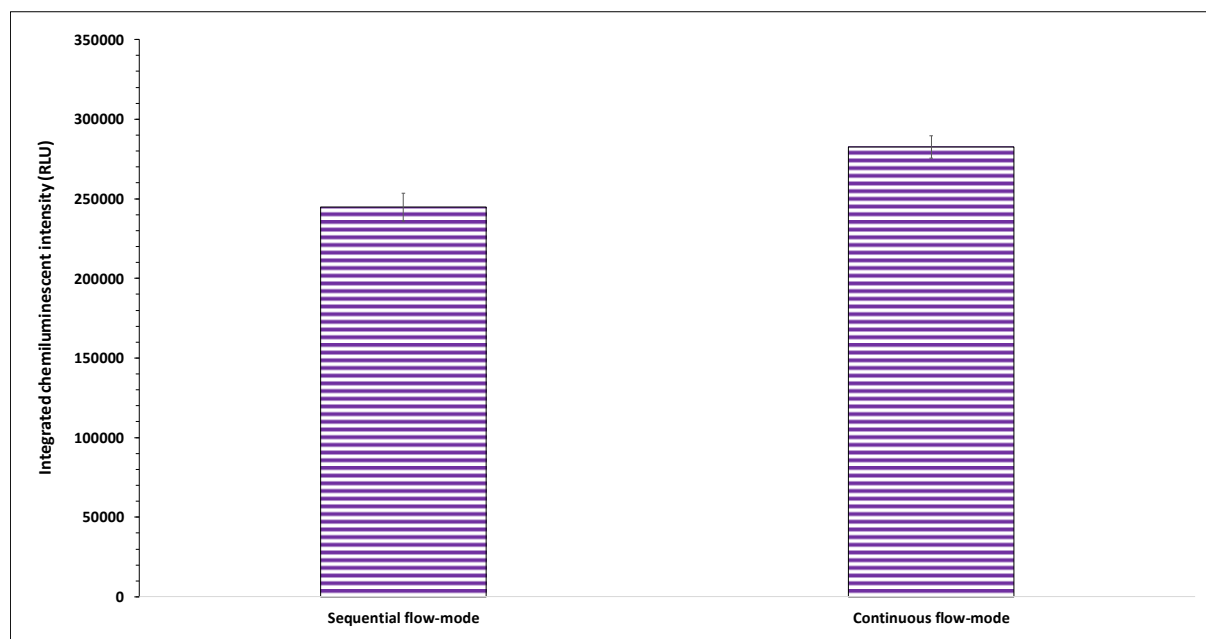

**Figure S4.** Effect of different types of sample addition modes on the integrated chemiluminescent intensity of VFIA platform.
